# Supplementary material
Source: PubMed Central journal article supplement (PMC2781580)

## SUPPLEMENTARY FIGURES

Fig. S1. Affinity purification of FLAG-tagged collagen VII with M2-agarose. To demonstrate the specificity of the affinity purification by M2-agarose, conditioned medium of cells transfected with a cDNA for either FLAG- or His-tagged collagen VII was applied into the M2-agarose column, and the flow-through, washing and elution fractions were analyzed by immunoblotting with antibodies to the FLAG-tag (**A**: upper panel) or His-tag (**A**: lower panel). The lanes in the immunoblots (from left to right) show: the total amount of tagged collagen in the medium; unbound fraction not retained in the M2-agarose column; the first two washing steps preceding the elution; and the elution fraction. The blots demonstrate that FLAG-tagged collagen is bound to the column quite efficiently. In contrast, most of His-tagged collagen passed the column directly, and residual amounts were completely rinsed off within the first two washing steps. No His-tagged collagen was found in the elution fraction. **B**: As a control, a 1 : 1 mixture of FLAG- and His-tagged collagen VII was applied to the M2-agarose column. This resulted in His-tagged molecules appearing in the flow-through (unbound) and washing fraction one. Importantly, under these conditions, where WT : mutant hybrid formation was impossible, no His-tagged collagen VII was visible in the elution fraction (bound).

# Figure S1

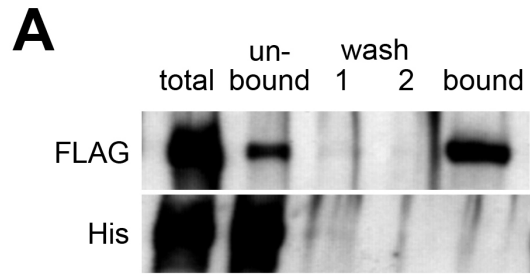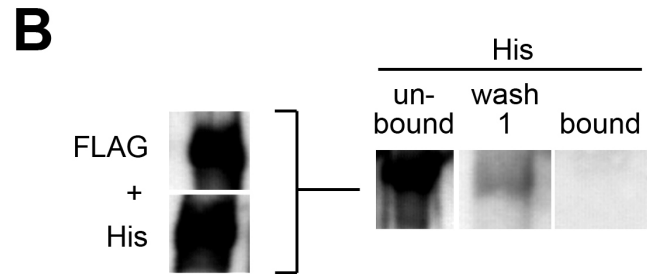

Supplement: supp_M109.045294_jbc.M109.045294-1.pdf [file supp_M109.045294_jbc.M109.045294-1.pdf]
